# Supplementary material
Source: bioRxiv or medRxiv preprint supplement (https://medrxiv.org/highwire/filestream/78219/field_highwire_adjunct_files/0/2020.04.24.20076620-1.pdf)
Supplement: Supplementary file [file 2020.04.24.20076620-1.pdf]

## Supplementary materials

### *Measures:*

**Adherence to instructions (AtI):** For this study, a self-report questionnaire consisting of 19 items was composed referring to each of the instructions of the Israeli Ministry of Health for the COVID-19 pandemic at the corresponding period (March 28– April 10, 2020). Respondents were asked to rate to what extent they adhered to each of the instructions on a five-points Likert scale (1 = ‘Not at all’, 5= ‘Very strictly’). Instructions of the Israeli HMI were similar to the recommendations of the world health organization (WHO) with some adaptations for the Israeli culture (e.g., avoiding kissing Mezuzah). The 19 instructions are presented in Table S1.

Table S1:

|                                                         |                                                                                                                                                                                                                                                                 | Adherence level |               |                 |               |                       |
|---------------------------------------------------------|-----------------------------------------------------------------------------------------------------------------------------------------------------------------------------------------------------------------------------------------------------------------|-----------------|---------------|-----------------|---------------|-----------------------|
|                                                         |                                                                                                                                                                                                                                                                 | 1<br>Not at all | 2<br>Somewhat | 3<br>Moderately | 4<br>Strictly | 5<br>Very<br>strictly |
| Instructions released by the Israeli Ministry of Health |                                                                                                                                                                                                                                                                 | n (%)           | n (%)         | n (%)           | n (%)         | n (%)                 |
| 1                                                       | Going out in public is not allowed, except for one of the following purposes (Going to and returning from the work place, as permitted by regulations; Purchase of food, medicines, essential products and receiving vital services; Receiving medical service) | 5 (0.8)         | 11 (1.7)      | 28 (4.4)        | 151 (23.5)    | 447 (69.6)            |
| 2                                                       | A distance of at least 2 meters must be maintained between two people in public and at work.                                                                                                                                                                    | 5 (0.8)         | 19 (3.0)      | 65 (10.4)       | 212 (33.8)    | 327 (52.1)            |
| 3                                                       | Organized gathering of more than 2 people is forbidden, except for people, who live in the same household                                                                                                                                                       | 5 (0.8)         | 23 (3.6)      | 44 (6.9)        | 129 (20.2)    | 438 (68.5)            |
| 4                                                       | Maximal house ventilation is important                                                                                                                                                                                                                          | 13 (2.0)        | 30 (4.7)      | 123 (19.2)      | 208 (32.6)    | 265 (41.5)            |
| 5                                                       | Avoid physical contact, including hugging and handshakes                                                                                                                                                                                                        | 3 (0.5)         | 9 (1.4)       | 33 (5.2)        | 129 (20.2)    | 466 (72.8)            |
| 6                                                       | Open doors without hands                                                                                                                                                                                                                                        | 84 (13.4)       | 82 (13.1)     | 134 (21.3)      | 154 (24.5)    | 174 (27.7)            |
| 7                                                       | Avoid touching the face as much as possible                                                                                                                                                                                                                     | 74 (11.5)       | 126 (19.6)    | 188 (29.3)      | 162 (25.2)    | 92 (14.3)             |
| 8                                                       | Wash hands frequently                                                                                                                                                                                                                                           | 3 (0.5)         | 34 (5.3)      | 83 (12.9)       | 200 (31.2)    | 321 (50.1)            |
| 9                                                       | Sanitize handles and doors                                                                                                                                                                                                                                      | 146 (22.8)      | 112 (17.5)    | 140 (21.9)      | 122 (19.1)    | 120 (18.8)            |
| 10                                                      | Avoid kissing mezuzahs and other holy vessels                                                                                                                                                                                                                   | 17 (3.7)        | 29 (6.4)      | 46 (10.0)       | 98 (21.6)     | 264 (58.1)            |
| 11                                                      | Avoid shared eating (utensils, plates and food)                                                                                                                                                                                                                 | 46 (7.8)        | 45 (7.6)      | 70 (11.8)       | 123 (20.8)    | 307 (51.9)            |
| 12                                                      | In public, avoid gatherings of more than 10 people is forbidden                                                                                                                                                                                                 | 8 (1.3)         | 5 (0.8)       | 20 (3.2)        | 69 (11.2)     | 514 (83.4)            |
| 13                                                      | Covering your mouth and nose with your bent elbow or tissue when you cough or sneeze                                                                                                                                                                            | 10 (1.6)        | 22 (3.5)      | 69 (10.9)       | 158 (24.9)    | 375 (59.1)            |

|    |                                                                                                                          |          |          |            |            |            |
|----|--------------------------------------------------------------------------------------------------------------------------|----------|----------|------------|------------|------------|
| 14 | Traveling in a private vehicle will be with two passengers only (a driver and a passenger)                               | 7 (1.2)  | 10 (1.7) | 31 (5.3)   | 87 (14.8)  | 454 (77.1) |
| 15 | Avoiding unnecessary use of public transport                                                                             | 4 (0.8)  | 1 (0.2)  | 9 (1.9)    | 36 (7.6)   | 421 (89.4) |
| 16 | Use of telemedicine as much as possible is advised for any health problem, rather than arriving physically to the clinic | 6 (1.0)  | 6 (1.0)  | 21 (3.6)   | 79 (13.4)  | 476 (81.0) |
| 17 | Going out in public is not allowed, except for going to and returning from the work place (when allowed)                 | 6 (1.2)  | 3 (0.6)  | 25 (5.1)   | 69 (14.0)  | 391 (79.1) |
| 18 | Avoid opening a business that does not appear on the list of 'businesses allowed to operate'                             | 2 (0.7)  | 4 (1.5)  | 8 (3.0)    | 32 (11.8)  | 225 (83.0) |
| 19 | An individual, or people who live in the same household, may go out for a short time and up to a distance of 100 meters  | 31 (5.1) | 50 (8.2) | 101 (16.6) | 127 (20.8) | 301(49.3)  |

Health and personality factors:

Health status was assessed by specific four questions regarding sleep number of hours, physical activity, smoking, presence of chronic illness and a single-item self-rated health (SRH) 1 = poor to 10= excellent Likert scale. The SRH is a subjective measure the participant's own health impression. It was found to reflect individuals' perceptions of their physical health and psychological well-being (for detail see Bjorner, Fayers, & Idler, 2005).

The Kessler Screening Scale for Psychological Distress (K6, Kessler et al., 2002). We used an adapted version of this brief screening tool, probing for non-specific psychological distress in adults. For the purpose of the current study, we used only the first part of the scale, in which respondents rated on a five-level Likert scale (1 = 'All the time', 5 = 'none of the time') the level of six psychiatric common symptoms during the period of the COVID-19 crisis. The questionnaire is sensitive to high levels of mental distress (Kessler et al., 200, 2010), and is used in the annual US National Health Interview Survey (for more details see Kessler et al., 2010)

Adult ADHD Self-Report Scale in Hebrew (ASRS-v1.1, Kessler et al., 2005; Zohar & Konfortes, 2010). The level of the participants' ADHD symptoms was measured using the self-report ASRS-v1.1 scale. This scale consists of 18 items, directly relating to the DSM–IV TR (APA, 2000) diagnostic criteria. The Hebrew version (ASRS-v1.1; Zohar & Konfortes, 2010) has high reliability,  $\alpha=.89$ , and acceptable levels of sensitivity and

specificity, 62.7% and 68%, respectively (Zohar & Konfortes, 2010). A total score of ASRS was created by averaging the responses to all 18 items.

The young adult Strengths and Difficulties Questionnaire (SDQ), the prosocial subscale (Brann, Lethbridge, & Mildred, 2018; Goodman, 1999). Respondents rated the extent to which a series of six attributes described them during six months reference period on a three-level response scale (0 = ‘*not true*’, 1 = ‘*somewhat true*’, or 2 = ‘*certainly true*’).

Adult Risk-Taking Inventory (ARTI): A self-reporting questionnaire in Hebrew that measure the frequency of engagement in a spectrum of 40 risky behaviors. The scale is divided into two parts. The first measures the lifetime frequency of 19 relatively rare activities (e.g., sky diving, investing a month’s income in a very speculative stock) on a 7-point rating scale, ranging from 1 (Not at all) to 7 (More than 50 times). The second part involves the last year frequency of 21 relatively frequent activities (e.g., sunbathing without sunscreen, smoking marijuana) with respect to their frequency during the preceding year on a 7-point rating scale, ranging from 1 (Not at all) to 7 (On a daily basis). Previous work has shown that the ARTI has good reliability and validity (Shoham et al., 2019).

Perceived Risk of COVID-19 Scale: For this study, a six-item self-report questionnaire was composed for measuring participants’ perceived risk of COVID-19 based on the risk perception literature (e.g., Sjöberg & Rundmo, 2004). Respondents rated on a seven-points Likert scale (1 = ‘*Not at all*’, 7 = ‘*Extremely*’) how risky COVID-19 was for them and for their close people, how likely they and their close people would be infected by COVID-19, and how fearful they are that they and their close people would be infected by COVID-19. In this sample, the scale had acceptable internal consistency (Cronbach’s  $\alpha = .78$ ).

Perceived Efficacy of the Ministry of Health Instructions Scale: For this study, a self-report questionnaire consisting of four items was composed for measuring participants’ perceived efficacy of the instructions. Respondents rated a six-points Likert scale (1 = ‘*Not at all*’, 6 = ‘*To a great extent*’) the extent to which they thought that the instructions were effective for coping with COVID-19, that adherence would maintain their health, their close

people's health, and the public's health. In this sample, the scale had good internal consistency (Cronbach's  $\alpha = .87$ ).

Bjorner, J. B., Fayers, P., & Idler, E. (2005). Self-rated health. *Assessing quality of life*, 309-323.

Brann, P., Lethbridge, M. J., & Mildred, H. (2018). The young adult Strengths and Difficulties Questionnaire (SDQ) in routine clinical practice. *Psychiatry research*, 264, 340-345.

Goodman, R. (1999). The extended version of the Strengths and Difficulties Questionnaire as a guide to child psychiatric caseness and consequent burden. *The Journal of Child Psychology and Psychiatry and Allied Disciplines*, 40(5), 791-799.

Kessler R.C., Andrews G., Colpe L.J., Hiripi E., Mroczek D.K., Normand S.L., Walters E.E., Zaslavsky A.M. (2002) Short screening scales to monitor population prevalences and trends in non-specific psychological distress. *Psychological Medicine*, 32, 959–976, DOI: 10.1017/S0033291702006074

Kessler, R. C., Adler, L., Ames, M., Demler, O., Faraone, S., Hiripi, E., . . . Walters, E. E. (2005). The World Health Organization Adult ADHD Self-Report Scale (ASRS): A short screening scale for use in the general population. *Psychological Medicine*, 35, 245-256.

Kessler, R. C., Green, J. G., Gruber, M. J., Sampson, N. A., Bromet, E., Cuitan, M., ... & Lara, C. (2010). Screening for serious mental illness in the general population with the K6 screening scale: results from the WHO World Mental Health (WMH) survey initiative. *International journal of methods in psychiatric research*, 19(S1), 4-22.

Mansbach-Kleinfeld, I., Apter, A., Farbstein, I., Levine, S. Z., & Poznizovsky, A. (2010).

Sjöberg, L., Moen, B. E., & Rundmo, T. (2004). Explaining risk perception. *An evaluation of the psychometric paradigm in risk perception research*, 10(2), 665-612.

Zohar, A. H., & Konfortes, H. (2010). Diagnosing ADHD in Israeli adults: The psychometric properties of the adult ADHD Self Report Scale (ASRS) in Hebrew. *The Israel Journal of Psychiatry and Related Sciences*, 47, 308-315.
